# Supplementary material
Source: HighWire-hosted journal article supplement (https://bmjopenquality.bmj.com/content/10/4/e001305)
Supplement: inline-supplementary-material-4 [file inline-supplementary-material-4.pdf]

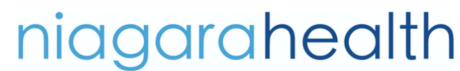

---

**PAD Program** Pain, Agitation and Delirium

---

When you are rounding, please consider asking some of the following questions:

**PAIN**

1. What is the patient's pain level?
2. How often are we checking patient's pain level?

**AGITATION**

3. What is the patient's RASS?
4. How often are we checking patient's RASS?
5. Is our RASS within the target range?
6. Has the patient's RASS been fluctuating during the last 24 hours?

**DELIRIUM**

7. Is patient CAM-ICU screen positive for delirium?
8. How often are we screening patient for delirium?
9. Does the patient wear glasses or hearing aids? If so, are they here and are they wearing them?
10. How did the patient sleep last night?
