# Supplementary material
Source: HighWire-hosted journal article supplement (https://bmjopenquality.bmj.com/content/10/4/e001305)
Supplement: inline-supplementary-material-5 [file inline-supplementary-material-5.pdf]

# DON'T DISMISS DELIRIUM!

.....  
It takes the healthcare  
**TEAM, PATIENTS**  
& **FAMILIES**  
working together to  
**RECOGNIZE**  
**TREAT**  
& **PREVENT**  
*delirium*

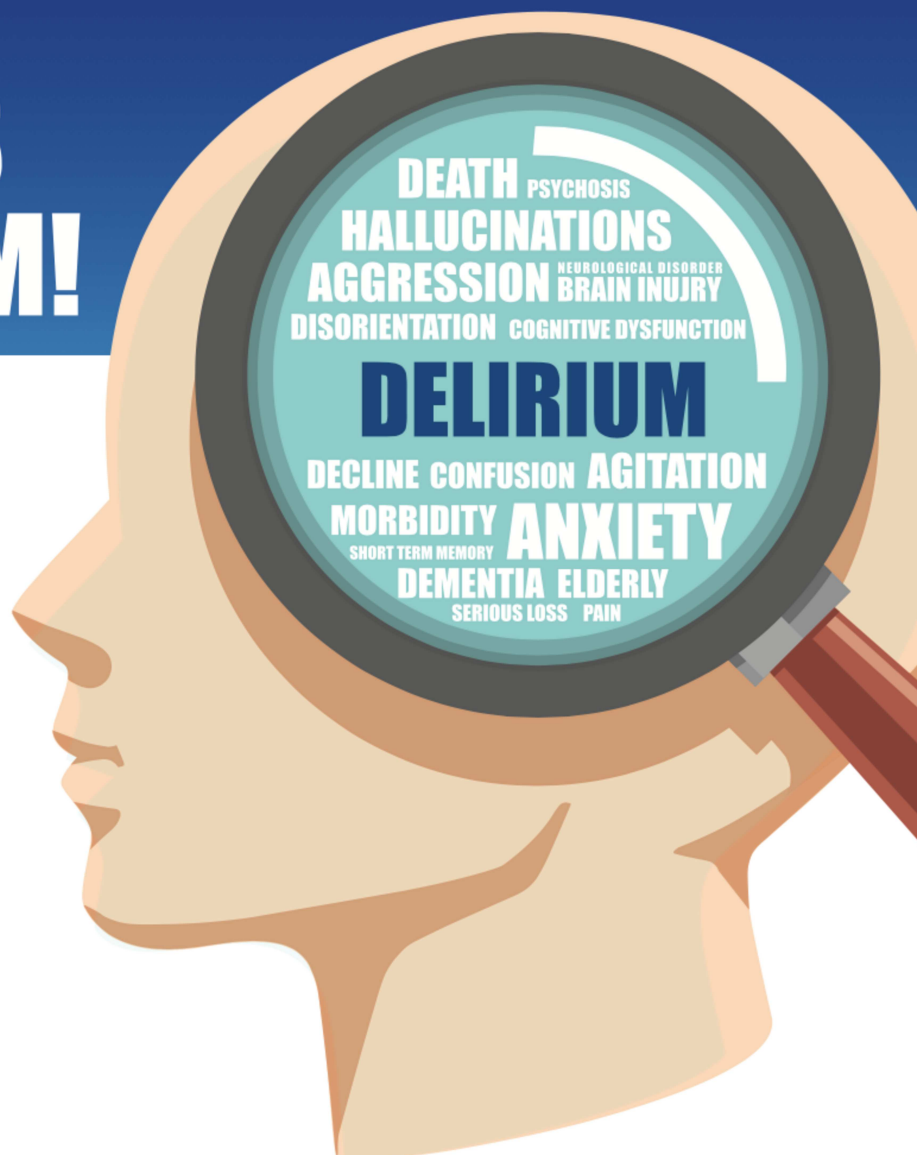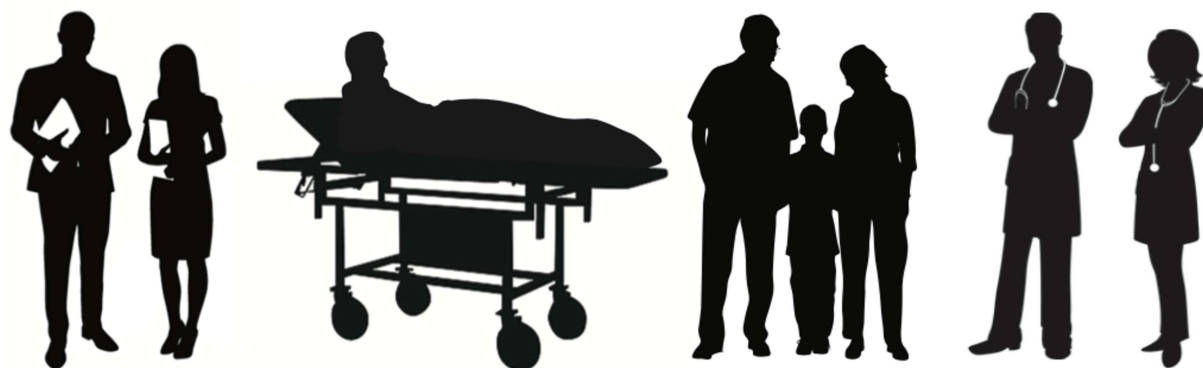

niagarahealth

**PAD Program** Pain, Agitation and Delirium
